# Supplementary material
Source: PubMed Central journal article supplement (PMC4791617)
Supplement: aasm.39.4.833s1.pdf [file aasm.39.4.833s1.pdf]

**Table S1A.** Cross-sectional analyses: multivariable ordinal logistic regression with psychological and social work factors as independent variables and difficulties initiating sleep as dependent variable. Separate regressions were run with independent variables entered as categorical and continuous.

| Psychological and social work factors |            | Confounders included <sup>a</sup>                             | Baseline sample |      |             | Follow-up sample |      |             |
|---------------------------------------|------------|---------------------------------------------------------------|-----------------|------|-------------|------------------|------|-------------|
|                                       |            |                                                               | n               | OR   | 99% CI      | n                | OR   | 99% CI      |
| Quantitative job demands              | 1          |                                                               | 582             | 1    | ref         | 543              | 1    | ref         |
|                                       | 2          |                                                               | 2063            | 1.34 | 1.07-1.67*  | 1843             | 1.30 | 1.02-1.64*  |
|                                       | 3          |                                                               | 2807            | 1.52 | 1.22-1.89** | 2591             | 1.47 | 1.17-1.85*  |
|                                       | 4          |                                                               | 1455            | 2.03 | 1.61-2.58** | 1282             | 1.70 | 1.33-2.18** |
|                                       | 5          |                                                               | 462             | 2.70 | 2.01-3.64** | 364              | 2.79 | 2.02-3.87** |
|                                       | Continuous |                                                               | 7369            | 1.38 | 1.28-1.49** | 6623             | 1.29 | 1.19-1.39** |
| Decision demands                      | 1          |                                                               | 124             | 1.00 | ref         | 111              | 1.00 | ref         |
|                                       | 2          |                                                               | 451             | 2.05 | 1.26-3.32*  | 386              | 0.93 | 0.55-1.57   |
|                                       | 3          |                                                               | 2899            | 2.35 | 1.51-3.65** | 2752             | 1.18 | 0.74-1.90   |
|                                       | 4          |                                                               | 2531            | 2.81 | 1.80-4.39** | 2244             | 1.40 | 0.87-2.25   |
|                                       | 5          |                                                               | 1126            | 3.68 | 2.32-5.83** | 954              | 1.46 | 0.89-2.39   |
|                                       | Continuous |                                                               | 7131            | 1.39 | 1.28-1.51** | 6447             | 1.21 | 1.11-1.33** |
| Decision control                      | 1          | Empowering leadership, support from superior                  | 521             | 1.00 | ref         | 506              | 1.00 | ref         |
|                                       | 2          |                                                               | 2128            | 0.92 | 0.73-1.16   | 1891             | 0.92 | 0.73-1.18   |
|                                       | 3          |                                                               | 2752            | 0.86 | 0.68-1.08   | 2497             | 0.79 | 0.62-1.00   |
|                                       | 4          |                                                               | 1565            | 0.79 | 0.61-1.01   | 1386             | 0.71 | 0.54-0.92*  |
|                                       | 5          |                                                               | 365             | 0.75 | 0.54-1.05   | 314              | 0.48 | 0.33-0.70** |
|                                       | Continuous |                                                               | 7331            | 0.90 | 0.83-0.97*  | 6594             | 0.81 | 0.74-0.88** |
| Control of work pacing                | 1          | Decision control                                              | 1001            | 1.00 | ref         | 882              | 1.00 | ref         |
|                                       | 2          |                                                               | 1384            | 0.84 | 0.69-1.02   | 1181             | 1.06 | 0.86-1.30   |
|                                       | 3          |                                                               | 1593            | 0.97 | 0.80-1.17   | 1395             | 0.95 | 0.77-1.30   |
|                                       | 4          |                                                               | 1896            | 0.96 | 0.79-1.17   | 1772             | 0.99 | 0.80-1.23   |
|                                       | 5          |                                                               | 1483            | 0.89 | 0.72-1.11   | 1387             | 0.83 | 0.66-1.05   |
|                                       | Continuous |                                                               | 7357            | 0.98 | 0.92-1.04   | 6617             | 0.93 | 0.87-1.00*  |
| Role clarity                          | 1          | Support from superior, empowering leadership, fair leadership | 60              | 1.00 | ref         | 46               | 1.00 | ref         |
|                                       | 2          |                                                               | 154             | 1.16 | 0.56-2.41   | 125              | 1.27 | 0.54-2.97   |
|                                       | 3          |                                                               | 774             | 0.79 | 0.41-1.52   | 667              | 0.89 | 0.42-1.88   |
|                                       | 4          |                                                               | 2163            | 0.69 | 0.36-1.32   | 2003             | 0.96 | 0.46-2.01   |
|                                       | 5          |                                                               | 4179            | 0.59 | 0.31-1.12   | 3749             | 0.86 | 0.41-1.79   |
|                                       | Continuous |                                                               | 7330            | 0.79 | 0.73-0.86** | 6590             | 0.90 | 0.82-0.99*  |

|                                      |            |                                                        |      |      |             |      |      |             |
|--------------------------------------|------------|--------------------------------------------------------|------|------|-------------|------|------|-------------|
| Role conflict                        | 1          |                                                        | 1324 | 1.00 | ref         | 1194 | 1.00 | ref         |
|                                      | 2          |                                                        | 2025 | 1.45 | 1.23-1.72** | 1887 | 1.31 | 1.10-1.57** |
|                                      | 3          |                                                        | 3129 | 2.02 | 1.72-2.36** | 2768 | 1.75 | 1.48-2.07** |
|                                      | 4          |                                                        | 659  | 2.86 | 2.28-3.59** | 594  | 2.43 | 1.90-3.09** |
|                                      | 5          |                                                        | 225  | 4.75 | 3.36-6.73** | 179  | 4.27 | 2.88-6.32** |
|                                      | Continuous |                                                        | 7362 | 1.57 | 1.47-1.69** | 6622 | 1.50 | 1.39-1.62** |
| Predictability during the next month | 1          | Social climate                                         | 110  | 1.00 | ref         | 103  | 1.00 | ref         |
|                                      | 2          |                                                        | 217  | 1.08 | 0.63-1.87   | 187  | 1.31 | 0.72-2.39   |
|                                      | 3          |                                                        | 881  | 0.95 | 0.59-1.52   | 816  | 1.29 | 0.77-2.16   |
|                                      | 4          |                                                        | 2038 | 0.92 | 0.59-1.46   | 1820 | 1.04 | 0.63-1.72   |
|                                      | 5          |                                                        | 4079 | 0.70 | 0.45-1.11   | 3660 | 0.81 | 0.49-1.34   |
|                                      | Continuous |                                                        | 7325 | 0.83 | 0.77-0.89** | 6586 | 0.81 | 0.75-0.88** |
| Support from superior                | 1          | Fair leadership, Social climate                        | 254  | 1.00 | ref         | 256  | 1.00 | ref         |
|                                      | 2          |                                                        | 377  | 0.70 | 0.48-1.03   | 367  | 0.59 | 0.40-0.87*  |
|                                      | 3          |                                                        | 1540 | 0.58 | 0.42-0.80*  | 1396 | 0.53 | 0.38-0.74** |
|                                      | 4          |                                                        | 2136 | 0.47 | 0.35-0.65** | 1935 | 0.44 | 0.32-0.62** |
|                                      | 5          |                                                        | 3003 | 0.34 | 0.25-0.47** | 2625 | 0.31 | 0.22-0.43** |
|                                      | Continuous |                                                        | 7310 | 0.72 | 0.67-0.76** | 6579 | 0.72 | 0.67-0.78** |
| Empowering leadership                | 1          | Support from superior, fair leadership, social climate | 707  | 1.00 | ref         | 674  | 1.00 | ref         |
|                                      | 2          |                                                        | 1067 | 1.00 | 0.79-1.26   | 990  | 0.98 | 0.77-1.26   |
|                                      | 3          |                                                        | 2624 | 0.93 | 0.74-1.16   | 2345 | 0.93 | 0.73-1.19   |
|                                      | 4          |                                                        | 1692 | 0.93 | 0.72-1.20   | 1533 | 0.82 | 0.63-1.08   |
|                                      | 5          |                                                        | 1216 | 0.78 | 0.58-1.04   | 1033 | 0.75 | 0.55-1.02   |
|                                      | Continuous |                                                        | 7306 | 0.92 | 0.86-1.00*  | 6575 | 0.90 | 0.83-0.98*  |
| Fair leadership                      | 1          | Support from superior, social climate                  | 170  | 1.00 | ref         | 148  | 1.00 | ref         |
|                                      | 2          |                                                        | 671  | 1.27 | 0.85-1.89   | 618  | 1.26 | 0.81-1.95   |
|                                      | 3          |                                                        | 4517 | 1.27 | 0.88-1.83   | 4093 | 1.49 | 0.99-2.24   |
|                                      | 4          |                                                        | 1858 | 1.21 | 0.83-1.78   | 1650 | 1.30 | 0.85-1.99   |
|                                      | 5          |                                                        | 94   | 1.83 | 1.01-3.33   | 70   | 1.54 | 0.76-3.16   |
|                                      | Continuous |                                                        | 7310 | 1.10 | 0.99-1.23   | 6579 | 1.06 | 0.94-1.19   |
| Social climate                       | 1          | Fair leadership                                        | 94   | 1.00 | ref         | 73   | 1.00 | ref         |
|                                      | 2          |                                                        | 728  | 1.30 | 0.77-2.18   | 709  | 0.85 | 0.46-1.55   |
|                                      | 3          |                                                        | 5257 | 1.04 | 0.63-1.70   | 4773 | 0.75 | 0.42-1.35   |
|                                      | 4          |                                                        | 1197 | 0.78 | 0.47-1.31   | 994  | 0.56 | 0.31-1.03*  |
|                                      | 5          |                                                        | 45   | 1.16 | 0.49-2.73   | 42   | 0.95 | 0.37-2.48*  |
|                                      | Continuous |                                                        | 7321 | 0.77 | 0.69-0.86** | 6591 | 0.82 | 0.72-0.93*  |

|                                |            |                                                                                                                         |      |      |             |      |      |             |
|--------------------------------|------------|-------------------------------------------------------------------------------------------------------------------------|------|------|-------------|------|------|-------------|
| Commitment to the organization | 1          | Support from superior, fair leadership, social climate                                                                  | 269  | 1.00 | ref         | 273  | 1.00 | ref         |
|                                | 2          |                                                                                                                         | 509  | 1.07 | 0.75-1.53   | 448  | 0.90 | 0.62-1.31   |
|                                | 3          |                                                                                                                         | 1794 | 0.80 | 0.58-1.10   | 1667 | 0.82 | 0.59-1.13   |
|                                | 4          |                                                                                                                         | 2132 | 0.73 | 0.53-1.00*  | 1872 | 0.70 | 0.51-0.98   |
|                                | 5          |                                                                                                                         | 2514 | 0.58 | 0.42-0.81** | 2302 | 0.56 | 0.40-0.78*  |
|                                | Continuous |                                                                                                                         | 7218 | 0.80 | 0.74-0.86** | 6562 | 0.80 | 0.74-0.86** |
| Positive challenges at work    | 1          | Decision control, role conflict, support from superior, fair leadership, social climate, commitment to the organization | 91   | 1.00 | ref         | 85   | 1.00 | ref         |
|                                | 2          |                                                                                                                         | 194  | 0.80 | 0.43-1.47   | 193  | 0.72 | 0.38-1.34   |
|                                | 3          |                                                                                                                         | 1278 | 0.74 | 0.43-1.26   | 1251 | 0.74 | 0.43-1.29   |
|                                | 4          |                                                                                                                         | 2478 | 0.72 | 0.43-1.23   | 2328 | 0.71 | 0.41-1.22   |
|                                | 5          |                                                                                                                         | 2946 | 0.66 | 0.39-1.13   | 2518 | 0.62 | 0.35-1.07   |
|                                | Continuous |                                                                                                                         | 6987 | 0.90 | 0.83-0.99   | 6375 | 0.89 | 0.81-0.98*  |

<sup>a</sup> Sex, age, and skill level were included in all multivariable analyses.

\* P < 0.01.

\*\* P < 0.0008, the Bonferroni-corrected threshold based on number of factors tested (0.01/13).

**Table S1B.** Cross-sectional analyses: multivariable ordinal logistic regression with psychological and social work factors as independent variables and disturbed sleep as dependent variable. Separate regressions were run with independent variables entered as categorical and continuous.

| Psychological and social work factors |            | Confounders included <sup>a</sup>                       | Baseline sample |      |             | Follow-up sample |      |             |
|---------------------------------------|------------|---------------------------------------------------------|-----------------|------|-------------|------------------|------|-------------|
|                                       |            |                                                         | n               | OR   | 99% CI      | n                | OR   | 99% CI      |
| Quantitative job demands              | 1          |                                                         | 582             | 1.00 | ref         | 546              | 1.00 | ref         |
|                                       | 2          |                                                         | 2063            | 1.34 | 1.07-1.67*  | 1829             | 1.40 | 1.11-1.77** |
|                                       | 3          |                                                         | 2807            | 1.52 | 1.22-1.89** | 2593             | 1.58 | 1.26-1.97** |
|                                       | 4          |                                                         | 1455            | 2.03 | 1.61-2.58** | 1279             | 1.80 | 1.41-2.30** |
|                                       | 5          |                                                         | 462             | 2.70 | 2.01-3.64** | 365              | 3.21 | 2.33-4.41** |
|                                       | Continuous |                                                         | 7369            | 1.38 | 1.28-1.49** | 6612             | 1.32 | 1.22-1.42** |
| Decision demands                      | 1          | Positive challenges at work                             | 124             | 1.00 | ref         | 114              | 1.00 | ref         |
|                                       | 2          |                                                         | 451             | 2.05 | 1.26-3.32** | 382              | 1.41 | 0.84-2.38   |
|                                       | 3          |                                                         | 2899            | 2.35 | 1.51-3.65** | 2749             | 1.60 | 1.00-2.57   |
|                                       | 4          |                                                         | 2531            | 2.81 | 1.80-5.83** | 2239             | 1.80 | 1.12-2.90*  |
|                                       | 5          |                                                         | 1126            | 3.68 | 2.32-5.83** | 953              | 2.05 | 1.25-3.35** |
|                                       | Continuous |                                                         | 7131            | 1.39 | 1.28-1.51** | 6437             | 1.21 | 1.11-1.33** |
| Decision control                      | 1          |                                                         | 5254            | 1.00 | ref         | 510              | 1.00 | ref         |
|                                       | 2          |                                                         | 2133            | 0.85 | 0.68-1.07   | 1895             | 0.86 | 0.68-1.09   |
|                                       | 3          |                                                         | 2763            | 0.73 | 0.58-0.91** | 2497             | 0.73 | 0.59-0.92   |
|                                       | 4          |                                                         | 1572            | 0.62 | 0.49-0.79** | 1391             | 0.64 | 0.50-0.82** |
|                                       | 5          |                                                         | 366             | 0.55 | 0.40-0.75** | 314              | 0.42 | 0.30-0.59** |
|                                       | Continuous |                                                         | 7358            | 0.81 | 0.75-0.87** | 6607             | 0.79 | 0.73-0.85** |
| Control of work pacing                | 1          |                                                         | 1003            | 1.00 | ref         | 879              | 1.00 | ref         |
|                                       | 2          |                                                         | 1384            | 0.81 | 0.66-0.98   | 1174             | 0.95 | 0.77-1.17   |
|                                       | 3          |                                                         | 1594            | 0.88 | 0.73-1.07   | 1383             | 0.88 | 0.72-1.08   |
|                                       | 4          |                                                         | 1896            | 0.83 | 0.69-1.00   | 1777             | 0.91 | 0.75-1.10   |
|                                       | 5          |                                                         | 1484            | 0.71 | 0.59-0.86** | 1394             | 0.77 | 0.63-0.95*  |
|                                       | Continuous |                                                         | 7361            | 0.91 | 0.86-0.96** | 6607             | 0.92 | 0.87-0.98** |
| Role clarity                          | 1          | Support from, superior, fair leadership, social climate | 59              | 1.00 | ref         | 45               | 1.00 | ref         |
|                                       | 2          |                                                         | 154             | 1.15 | 0.55-2.41   | 124              | 1.20 | 0.51-2.82   |
|                                       | 3          |                                                         | 772             | 0.78 | 0.40-1.52   | 664              | 0.94 | 0.44-2.02   |
|                                       | 4          |                                                         | 2158            | 0.69 | 0.36-1.32   | 2004             | 0.92 | 0.44-1.95   |
|                                       | 5          |                                                         | 4161            | 0.58 | 0.30-1.12   | 3723             | 0.77 | 0.36-1.63   |
|                                       | Continuous |                                                         | 7304            | 0.79 | 0.73-0.86** | 6560             | 1.19 | 0.77-0.92** |

|                                      |            |                                        |      |      |             |      |      |             |
|--------------------------------------|------------|----------------------------------------|------|------|-------------|------|------|-------------|
| Role conflict                        | 1          |                                        | 1324 | 1.00 | ref         | 1192 | 1.00 | ref         |
|                                      | 2          |                                        | 2025 | 1.45 | 1.23-1.72** | 1876 | 1.25 | 1.05-1.49   |
|                                      | 3          |                                        | 3129 | 2.02 | 1.72-2.36** | 2768 | 1.68 | 1.42-1.98** |
|                                      | 4          |                                        | 659  | 2.86 | 2.28-3.59** | 595  | 2.25 | 1.78-2.86** |
|                                      | 5          |                                        | 225  | 4.75 | 3.36-6.73** | 180  | 3.17 | 2.16-4.66** |
|                                      | Continuous |                                        | 7362 | 1.57 | 1.47-1.69** | 6611 | 1.44 | 1.34-1.55** |
| Predictability during the next month | 1          | Social climate                         | 110  | 1.00 | ref         | 101  | 1.00 | ref         |
|                                      | 2          |                                        | 217  | 1.08 | 0.63-1.87   | 186  | 1.08 | 0.60-1.94   |
|                                      | 3          |                                        | 881  | 0.95 | 0.59-1.52   | 818  | 1.09 | 0.66-1.79   |
|                                      | 4          |                                        | 2038 | 0.92 | 0.59-1.46   | 1813 | 0.98 | 0.60-1.59   |
|                                      | 5          |                                        | 4079 | 0.70 | 0.45-1.11   | 3660 | 0.81 | 0.50-1.31   |
|                                      | Continuous |                                        | 7325 | 0.83 | 0.77-0.89** | 6578 | 0.86 | 0.80-0.93** |
| Support from superior                | 1          | Fair leadership, social climate        | 254  | 1.00 | ref         | 254  | 1.00 | ref         |
|                                      | 2          |                                        | 377  | 0.70 | 0.48-1.03   | 371  | 0.55 | 0.37-0.81** |
|                                      | 3          |                                        | 1540 | 0.58 | 0.42-0.77** | 1396 | 0.52 | 0.38-0.73** |
|                                      | 4          |                                        | 2136 | 0.47 | 0.35-0.65** | 1931 | 0.41 | 0.30-0.57** |
|                                      | 5          |                                        | 3003 | 0.34 | 0.25-0.47** | 2620 | 0.29 | 0.21-0.41** |
|                                      | Continuous |                                        | 7310 | 0.72 | 0.67-0.76** | 6572 | 0.71 | 0.66-0.76** |
| Empowering leadership                | 1          | Support from superior, social climate  | 707  | 1.00 | ref         | 673  | 1.00 | ref         |
|                                      | 2          |                                        | 1067 | 1.00 | 0.79-1.26   | 993  | 0.95 | 0.75-1.21   |
|                                      | 3          |                                        | 2624 | 0.93 | 0.74-1.16   | 2338 | 0.83 | 0.65-1.06   |
|                                      | 4          |                                        | 1692 | 0.93 | 0.72-1.20   | 1529 | 0.74 | 0.57-0.97   |
|                                      | 5          |                                        | 1216 | 0.78 | 0.58-1.04   | 1035 | 0.73 | 0.54-0.99*  |
|                                      | Continuous |                                        | 7306 | 0.92 | 0.86-1.00*  | 6568 | 0.89 | 0.82-0.97** |
| Fair leadership                      | 1          | Support from superior, social climate  | 170  | 1.00 | ref         | 149  | 1.00 | ref         |
|                                      | 2          |                                        | 671  | 1.27 | 0.85-1.89   | 617  | 1.14 | 0.74-1.76   |
|                                      | 3          |                                        | 4517 | 1.27 | 0.88-1.83   | 4086 | 1.43 | 0.96-2.14   |
|                                      | 4          |                                        | 1858 | 1.21 | 0.83-1.78   | 1649 | 1.21 | 0.79-1.84   |
|                                      | 5          |                                        | 94   | 1.83 | 1.01-3.33*  | 71   | 1.34 | 0.67-2.69   |
|                                      | Continuous |                                        | 7310 | 1.10 | 0.99-1.23   | 6572 | 1.04 | 0.92-1.17   |
| Social climate                       | 1          | Support from superior, fair leadership | 94   | 1.00 | ref         | 72   | 1.00 | ref         |
|                                      | 2          |                                        | 726  | 1.25 | 0.74-2.10   | 705  | 0.79 | 0.43-1.43   |
|                                      | 3          |                                        | 5252 | 1.13 | 0.69-1.86   | 4759 | 0.88 | 0.49-1.56   |
|                                      | 4          |                                        | 1193 | 0.94 | 0.56-1.58   | 994  | 0.74 | 0.41-1.35   |
|                                      | 5          |                                        | 45   | 1.39 | 0.59-3.28   | 42   | 1.10 | 0.43-2.78   |
|                                      | Continuous |                                        | 7310 | 0.89 | 0.79-1.01   | 6572 | 0.98 | 0.86-1.11   |

|                                |            |                                                        |      |      |             |      |      |             |
|--------------------------------|------------|--------------------------------------------------------|------|------|-------------|------|------|-------------|
| Commitment to the organization | 1          | Support from superior, fair leadership, social climate | 269  | 1.00 | ref         | 275  | 1.00 | ref         |
|                                | 2          |                                                        | 509  | 1.07 | 0.75-1.53   | 446  | 0.96 | 0.67-1.37   |
|                                | 3          |                                                        | 1794 | 0.80 | 0.58-1.10   | 1664 | 0.85 | 0.62-1.16   |
|                                | 4          |                                                        | 2132 | 0.73 | 0.53-1.00   | 1869 | 0.70 | 0.51-0.96*  |
|                                | 5          |                                                        | 2514 | 0.58 | 0.42-0.81** | 2301 | 0.56 | 0.41-0.78** |
|                                | Continuous |                                                        | 7218 | 0.80 | 0.74-0.86** | 6555 | 0.80 | 0.74-0.85** |
| Positive challenges at work    | 1          | Support from superior, social climate                  | 92   | 1.00 | ref         | 84   | 1.00 | ref         |
|                                | 2          |                                                        | 197  | 0.81 | 0.44-1.39   | 195  | 0.67 | 0.36-1.23   |
|                                | 3          |                                                        | 1291 | 0.71 | 0.42-1.19   | 1256 | 0.67 | 0.39-1.16   |
|                                | 4          |                                                        | 2514 | 0.65 | 0.39-1.10   | 2333 | 0.60 | 0.35-1.02   |
|                                | 5          |                                                        | 2994 | 0.57 | 0.34-0.96*  | 2535 | 0.53 | 0.31-0.91*  |
|                                | Continuous |                                                        | 7088 | 0.85 | 0.79-0.92** | 6403 | 0.84 | 0.78-0.92** |

<sup>a</sup> Sex, age, and skill level were included in all multivariable analyses.

\* P < 0.01.

\*\* P < 0.0008, the Bonferroni-corrected threshold based on number of factors tested (0.01/13).
